# Supplementary material for: Inorganic Nitrogen Transport and Assimilation in Pea (Pisum sativum)
Source: MDPI journal article supplement (doi:10.3390/genes13010158), 2022-01-17
Supplement: s1 [file s1]

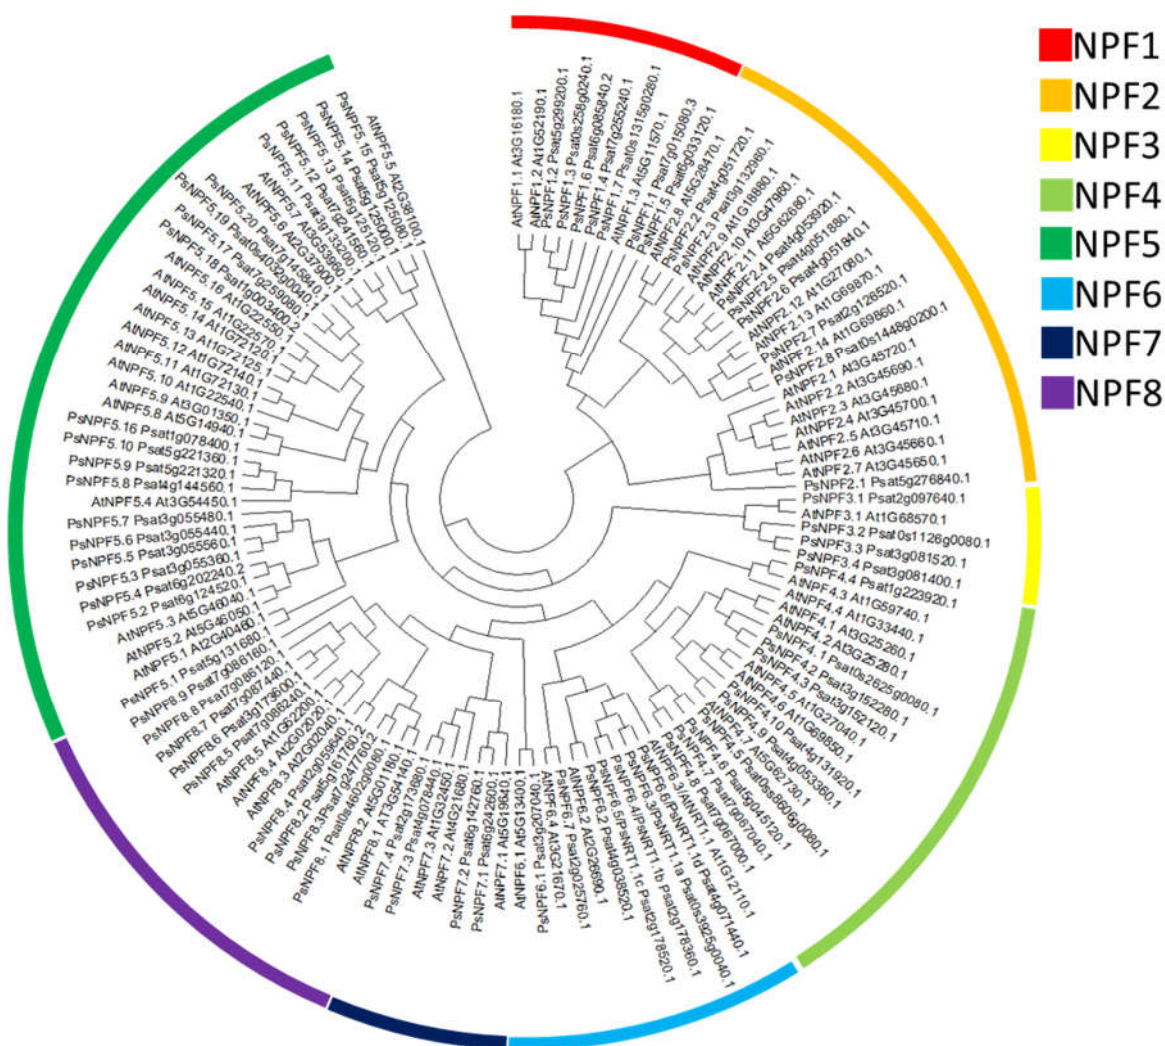

**Supplemental Figure S1.** A phylogenetic tree of NRT1/ PTR FAMILY (NPF) proteins from *Arabidopsis thaliana* and *Pisum sativum*

Eight NPF families are indicated by red (NPF1), orange (NPF2), yellow (NPF3), light green (NPF4), green (NPF5), blue (NPF6), indigo (NPF7) and purple (NPF8).

**A**

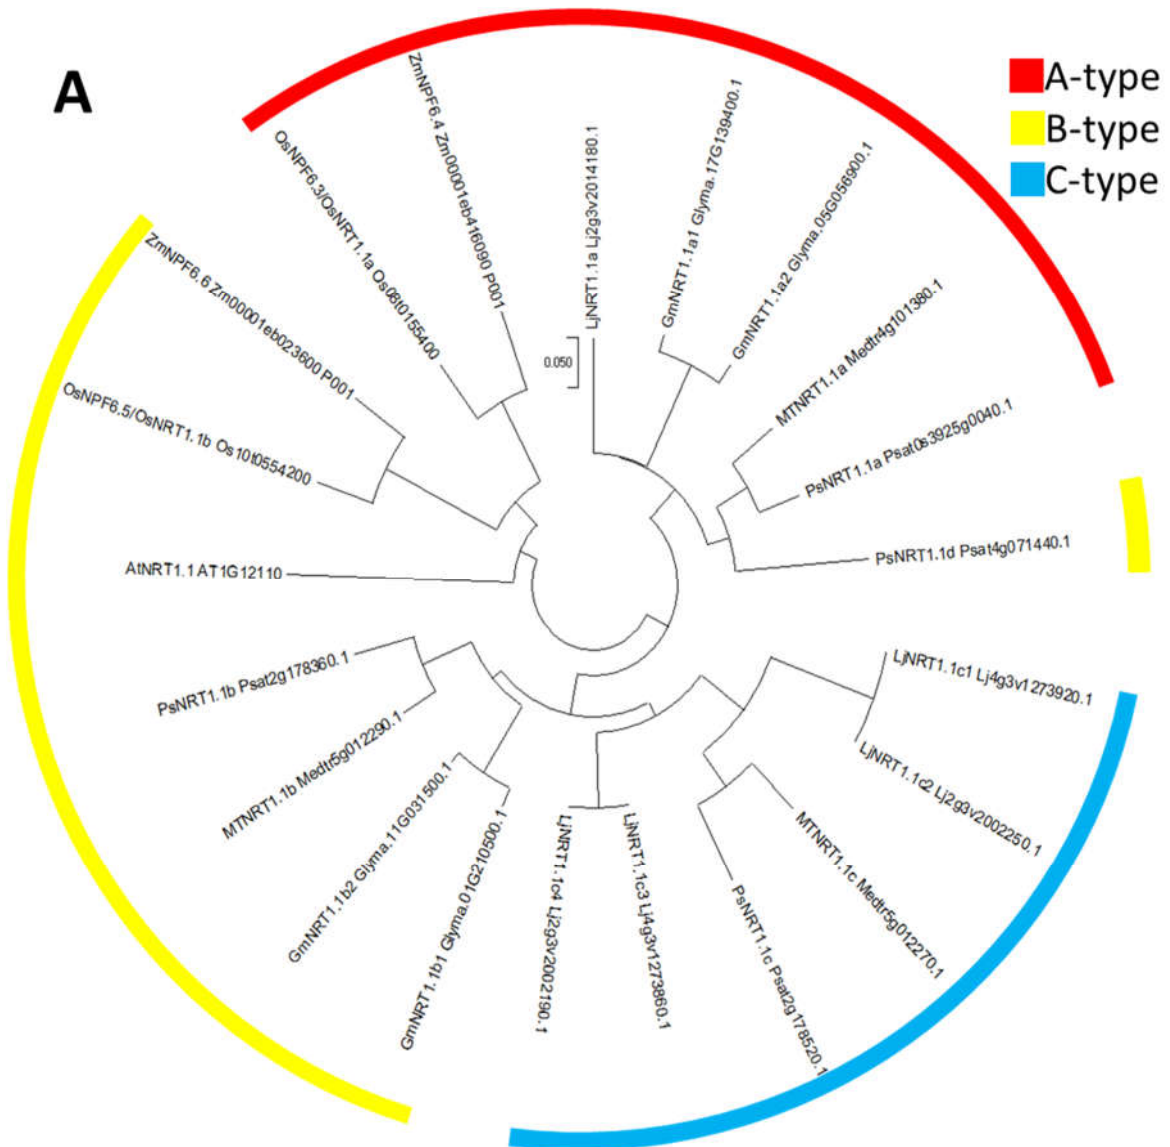

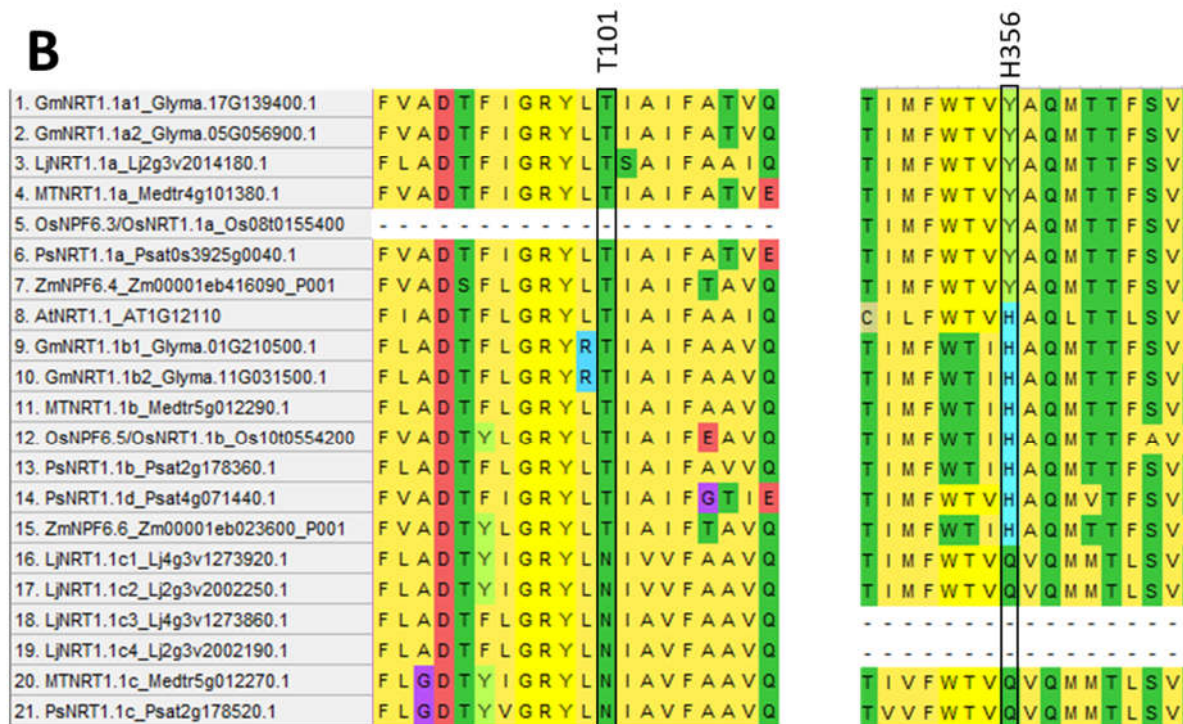

**Supplemental Figure S2.** Phylogenetic analysis of NITRATE TRANSPORTER 1.1 (NRT1.1) proteins (orthologues of AtNPF6.3) from *Arabidopsis thaliana*, *Medicago truncatula* and *Pisum sativum*

- Three NRT1.1 family subgroups. Red (subgroup-A), yellow (subgroup-B) and blue(subgroup-C). From the current *Lotus japonicus* genome, we found five NRT1.1s, which is one more than the reported by Criscuolo et al. (Plant Cell Environ. 2012 Sep;35(9):1567-81.doi: 10.1111/j.1365-3040.2012.02510.x.). A and B NRT1.1s from rice and maize clustered in the same clade, indicating parallel evolution of A and B subgroups in both monocot and dicot.
- The variation at amino acid (aa) Threonine (T) at aa 101 to Histidine (H) in C-subgroup and at amino acid Histidine at aa 356 to Tyrosine (Y) in A-subgroup and Glutamine (Q) in C-subgroup. The positions are corresponding to AtNRT1.1/AtNPF6.3.

We originally planned to include *Lotus japonicus* in the analysis of the NPF family, but to our great surprise, we found five LjNRT1.1 proteins, which is one more than the published paper (Plant Cell Environ. 2012 Sep;35(9):1567-81. doi: 10.1111/j.1365-3040.2012.02510.x. Epub 2012 Apr 19.). It looks as though the genome assembly and annotation of *Lotus japonicus* were renewed and new genes were found, so information about N transporters requires reviewing and we felt it was not a good model reference genome. For monocots, we found that both A and B subgroup NRT1.1 proteins from rice and maize clustered together as an outgroup of dicots proteins. This indicates that the nitrate sensing and signalling pathways are involved before the evolutionary separation of monocots and dicots. As this paper is to review transporters and signalling in pea, we only used the model plant of dicot, *Arabidopsis*, and model plant of legume, *Medicago truncatula*. Comparison between pea and rice will result variation between monocots and dicots, that is not specific for pea.

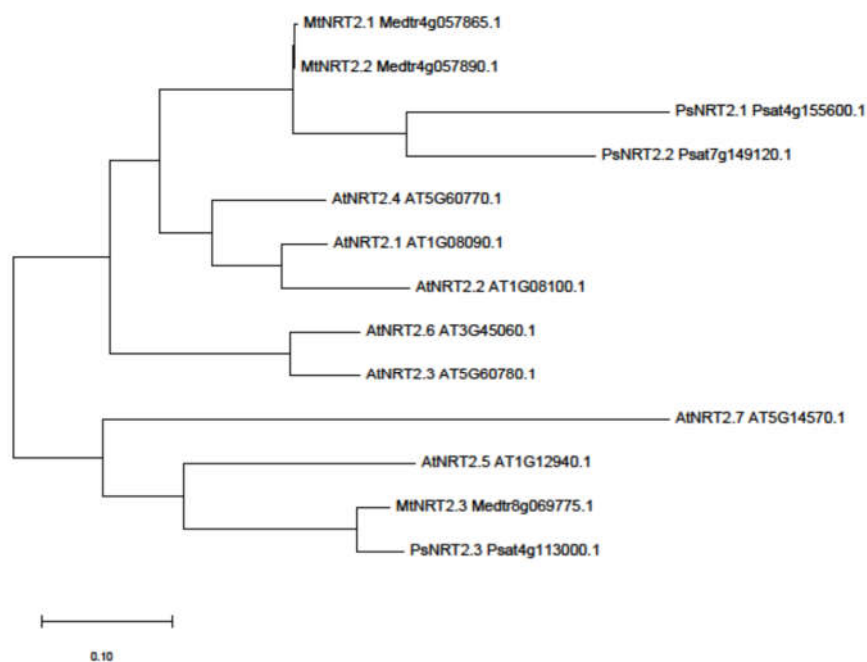

**Supplemental Figure S3.** A phylogenetic tree of NITRATE TRANSPORTER 2 (NRT2) from *Arabidopsis thaliana*, *Medicago truncatula* and *Pisum sativum*.

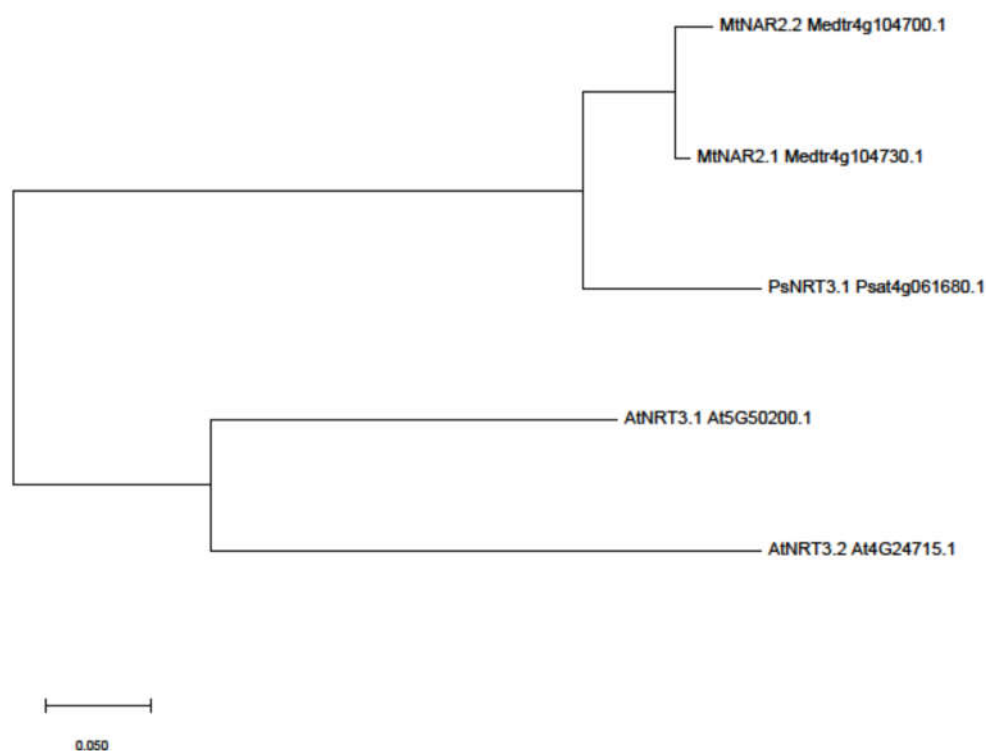

**Supplemental Figure S4.** A phylogenetic tree of High-affinity nitrate transporter-activating protein 2 (NAR2)/ NITRATE TRANSPORTER 3 (NRT3) proteins from *Arabidopsis thaliana*, *Medicago truncatula* and *Pisum sativum*.

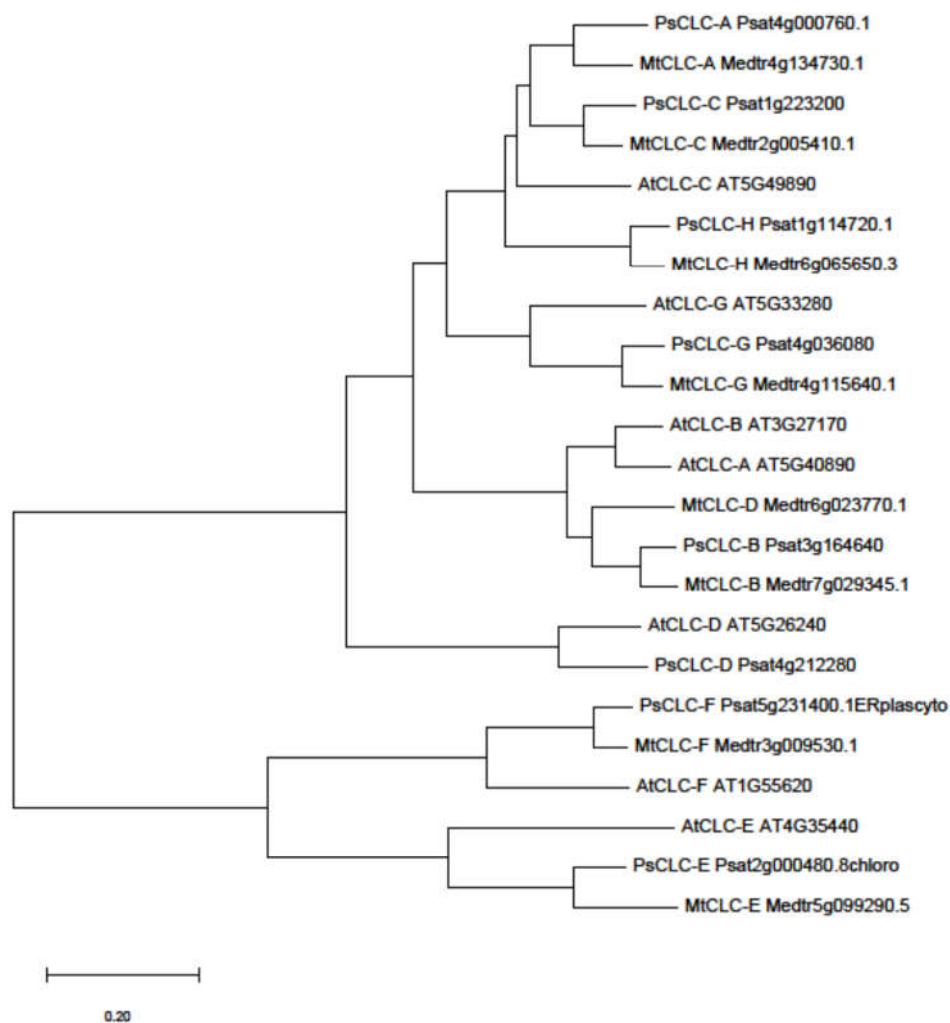

**Supplemental Figure S5.** A phylogenetic tree of CHLORIDE CHANNEL (CLC) proteins from *Arabidopsis thaliana*, *Medicago truncatula* and *Pisum sativum*.



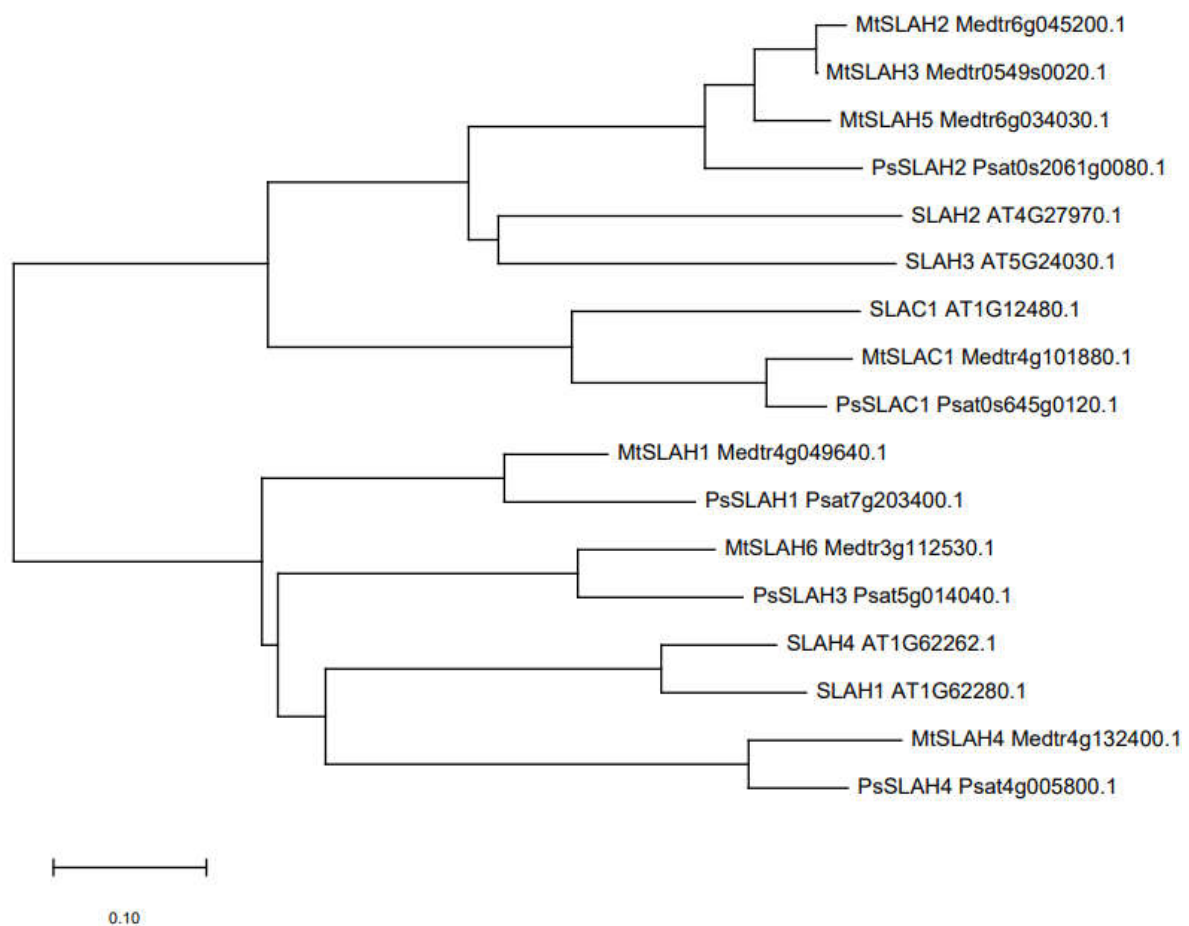

**Supplemental Figure S6.** A phylogenetic tree of SLOW ANION CHANNEL-ASSOCIATED 1 (SLAC1) and SLAC1 HOMOLOGUE (SLAH) family from *Arabidopsis thaliana*, *Medicago truncatula* and *Pisum sativum*.

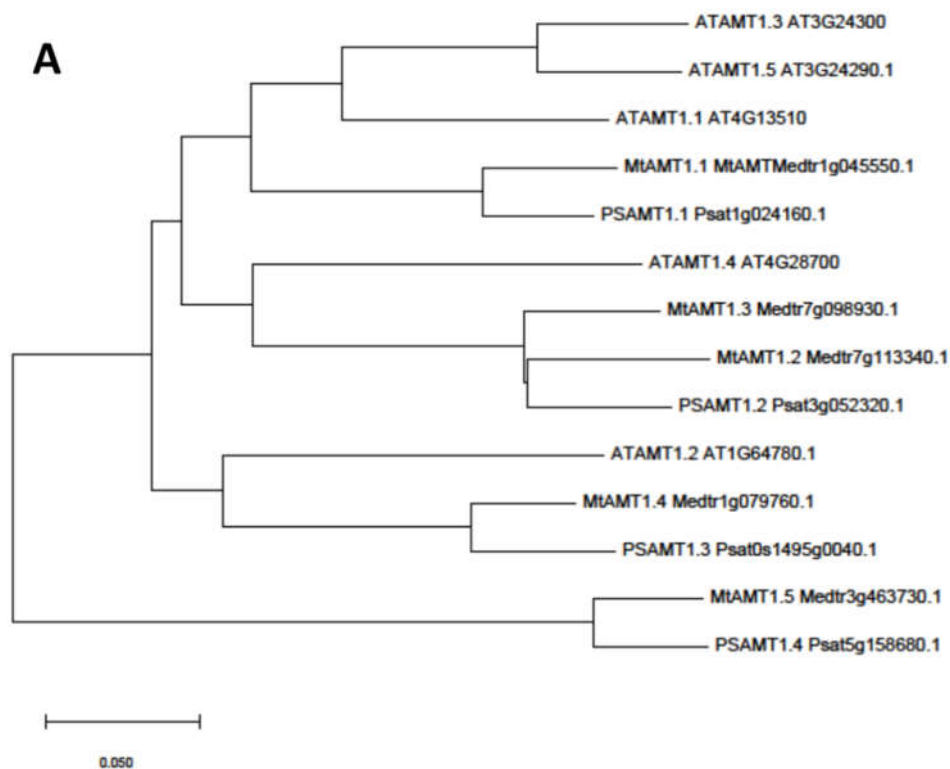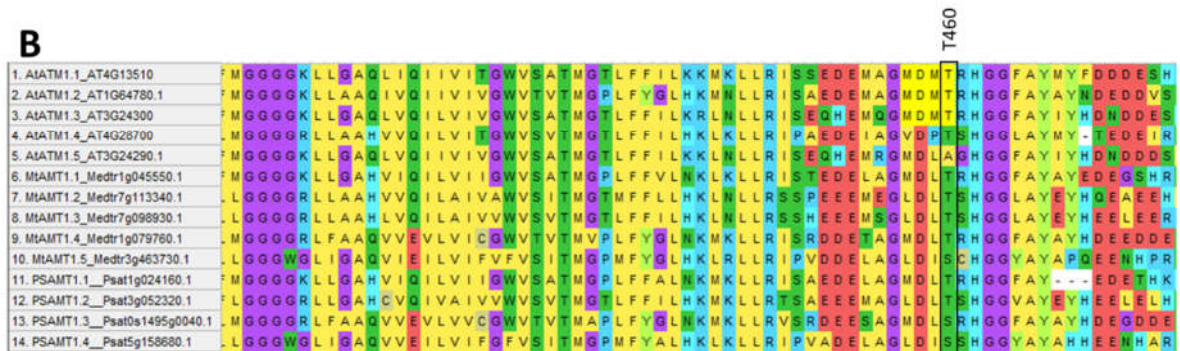



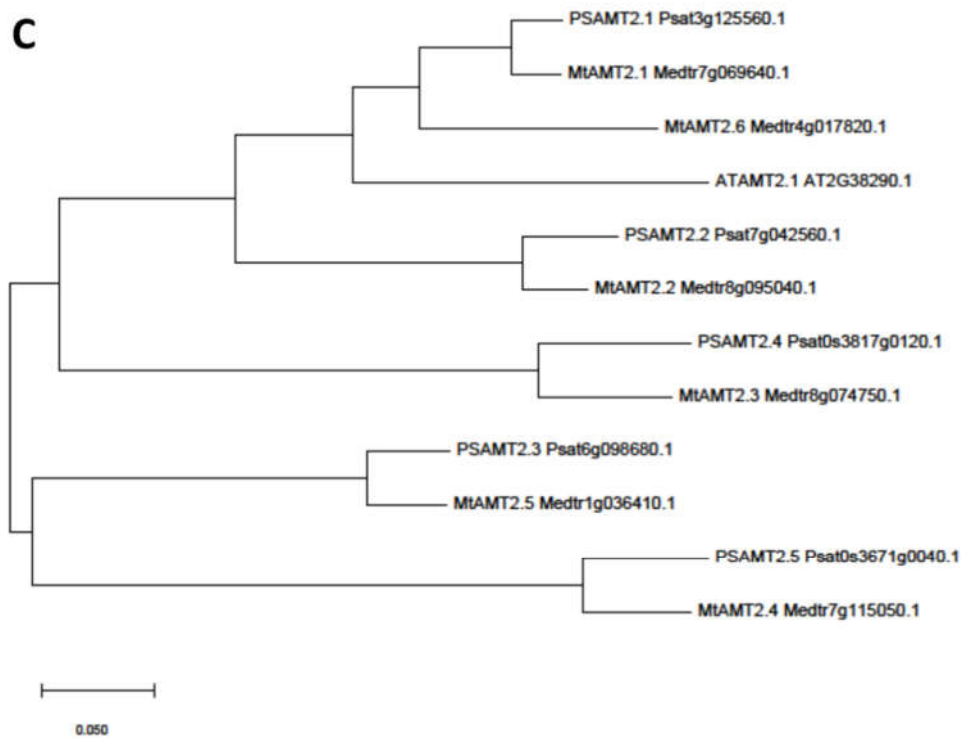

**Supplemental Figure S7.** A phylogenetic analysis of ammonium transporter (AMT) proteins from *Arabidopsis thaliana*, *Medicago truncatula* and *Pisum sativum*.

- A. A phylogenetic tree of AMT1s.
- B. Variations of phosphorylation site Threonine (T) 460 in AMT1.
- C. A phylogenetic tree of AMT2s.

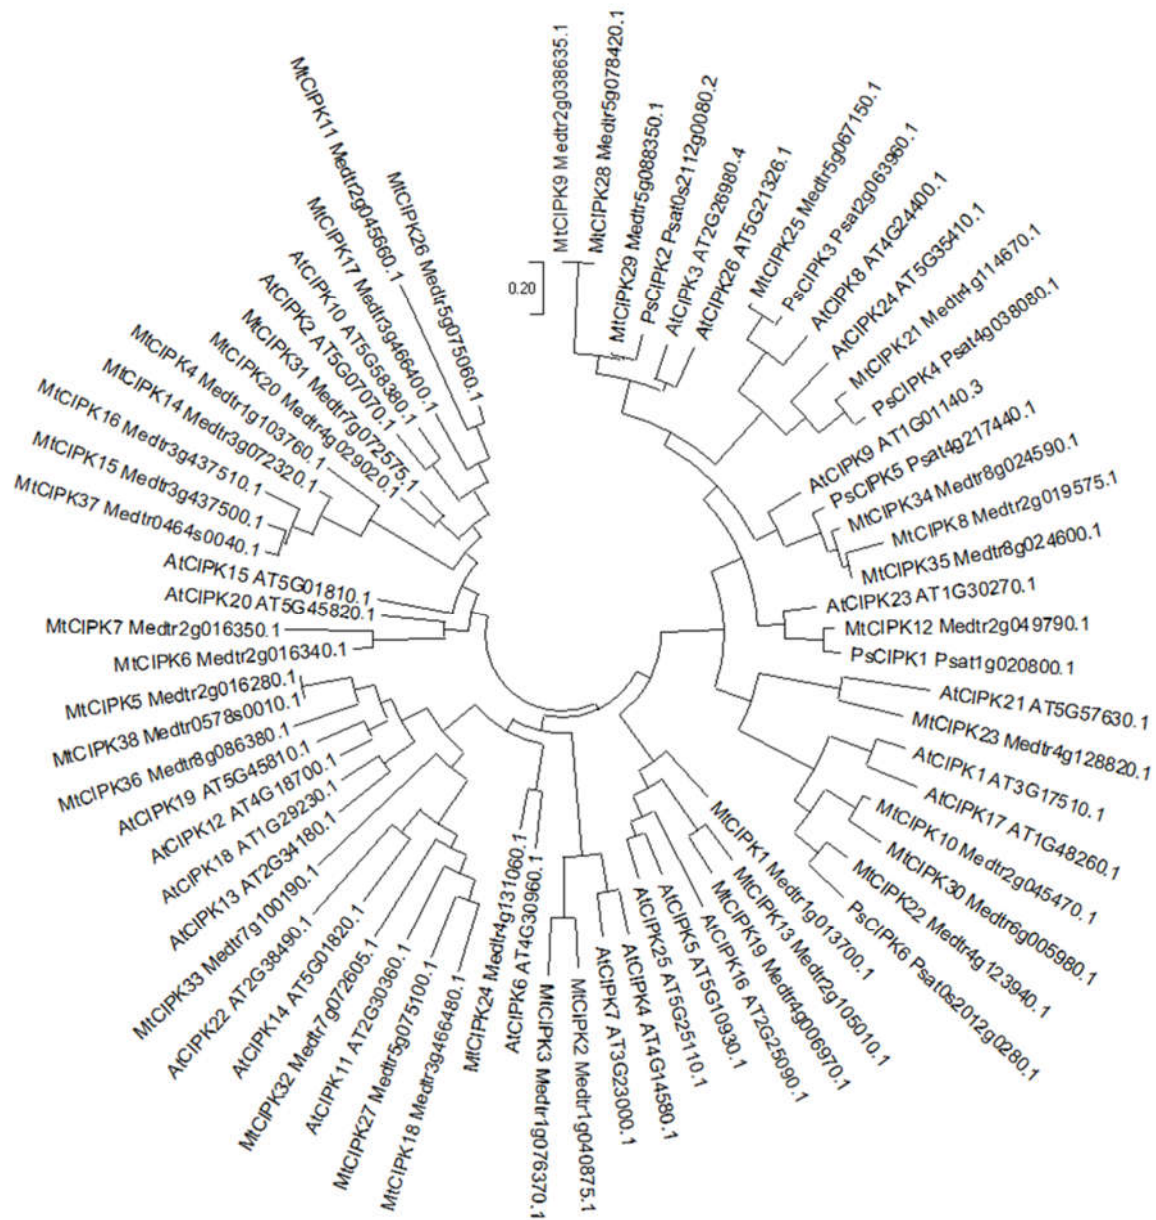

**Supplemental Figure S8** A phylogenetic tree of CALCINEURIN B-LIKE PROTEIN INTERACTING PROTEIN KINASES (CIPKs) from *Arabidopsis thaliana*, *Medicago truncatula* and *Pisum sativum*.

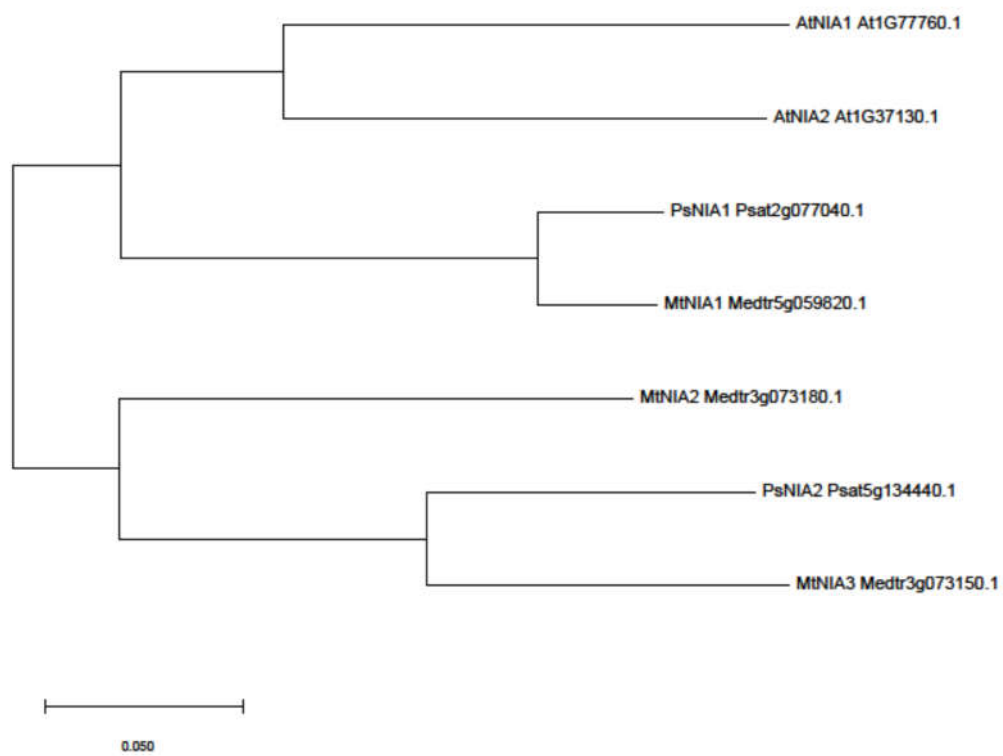

**Supplemental Figure S9.** A phylogenetic tree of NITRATE REDUCTASE (NIA) proteins from *Arabidopsis thaliana*, *Medicago truncatula* and *Pisum sativum*.

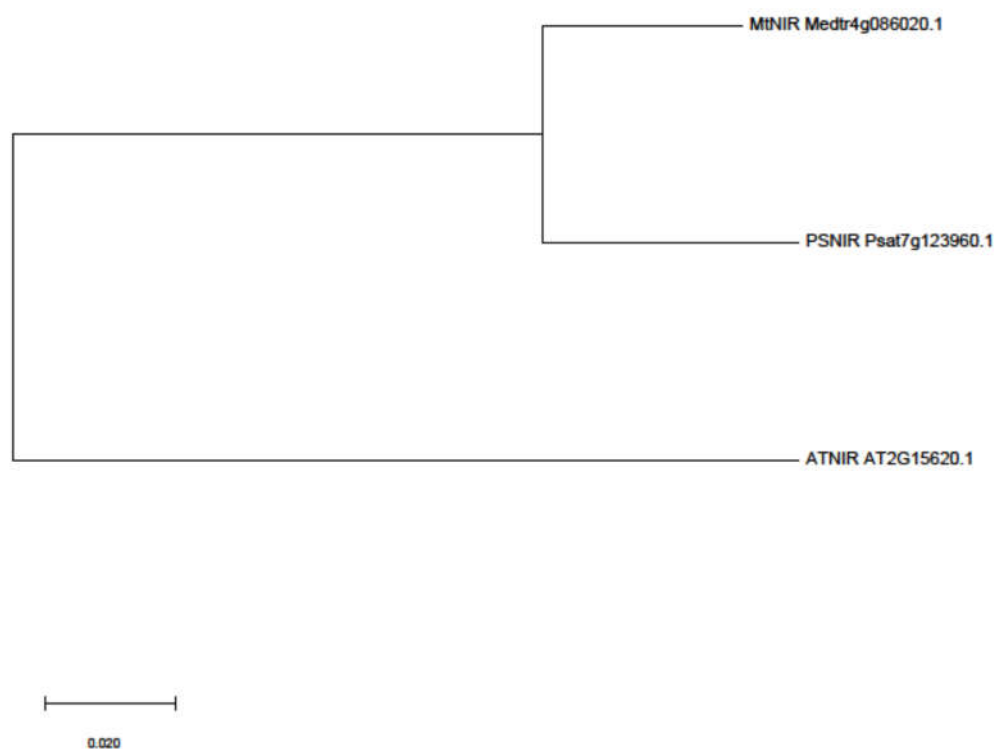

**Supplemental Figure S10.** A phylogenetic tree of NITRITE REDUCTASE (NIR) proteins from *Arabidopsis thaliana*, *Medicago truncatula* and *Pisum sativum*.

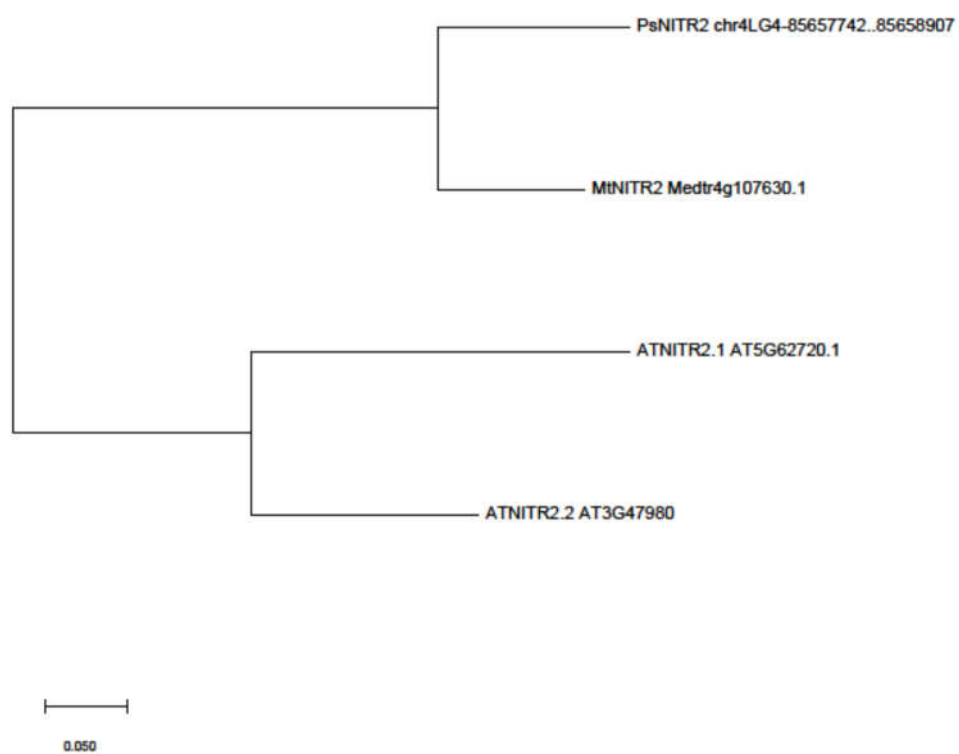

**Supplemental Figure S11.** A phylogenetic tree of NITR2 proteins from *Arabidopsis thaliana*, *Medicago truncatula* and *Pisum sativum*.

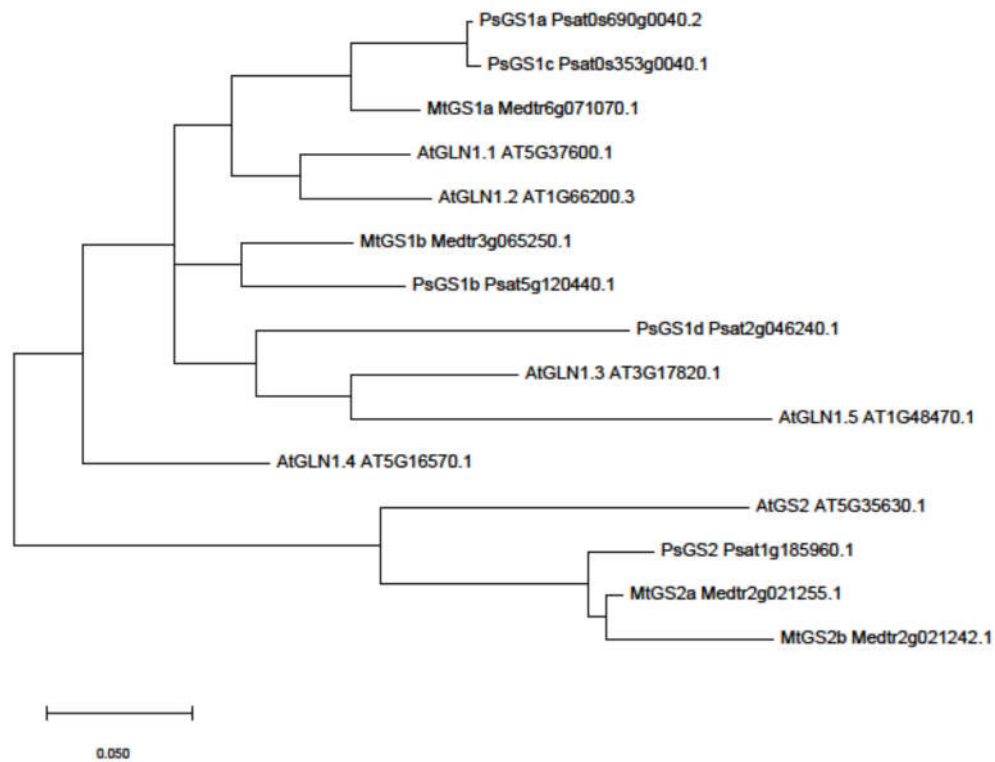

**Supplemental Figure S12.** A phylogenetic tree of glutamine synthetases (GS) in *Arabidopsis thaliana*, *Medicago truncatula* and *Pisum sativum*



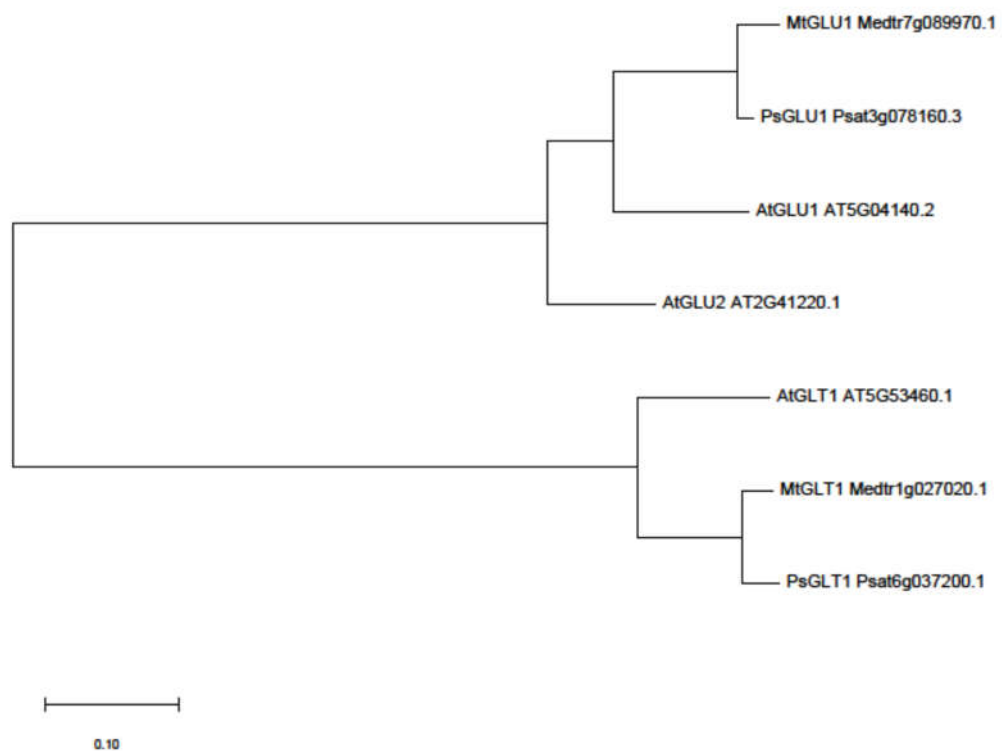

**Supplemental Figure S13.** A phylogenetic tree of GLUTAMATE SYNTHASE (GLU) and GLUCOSE TRANSPORTER (GLT) from *Arabidopsis thaliana*, *Medicago truncatula* and *Pisum sativum*.



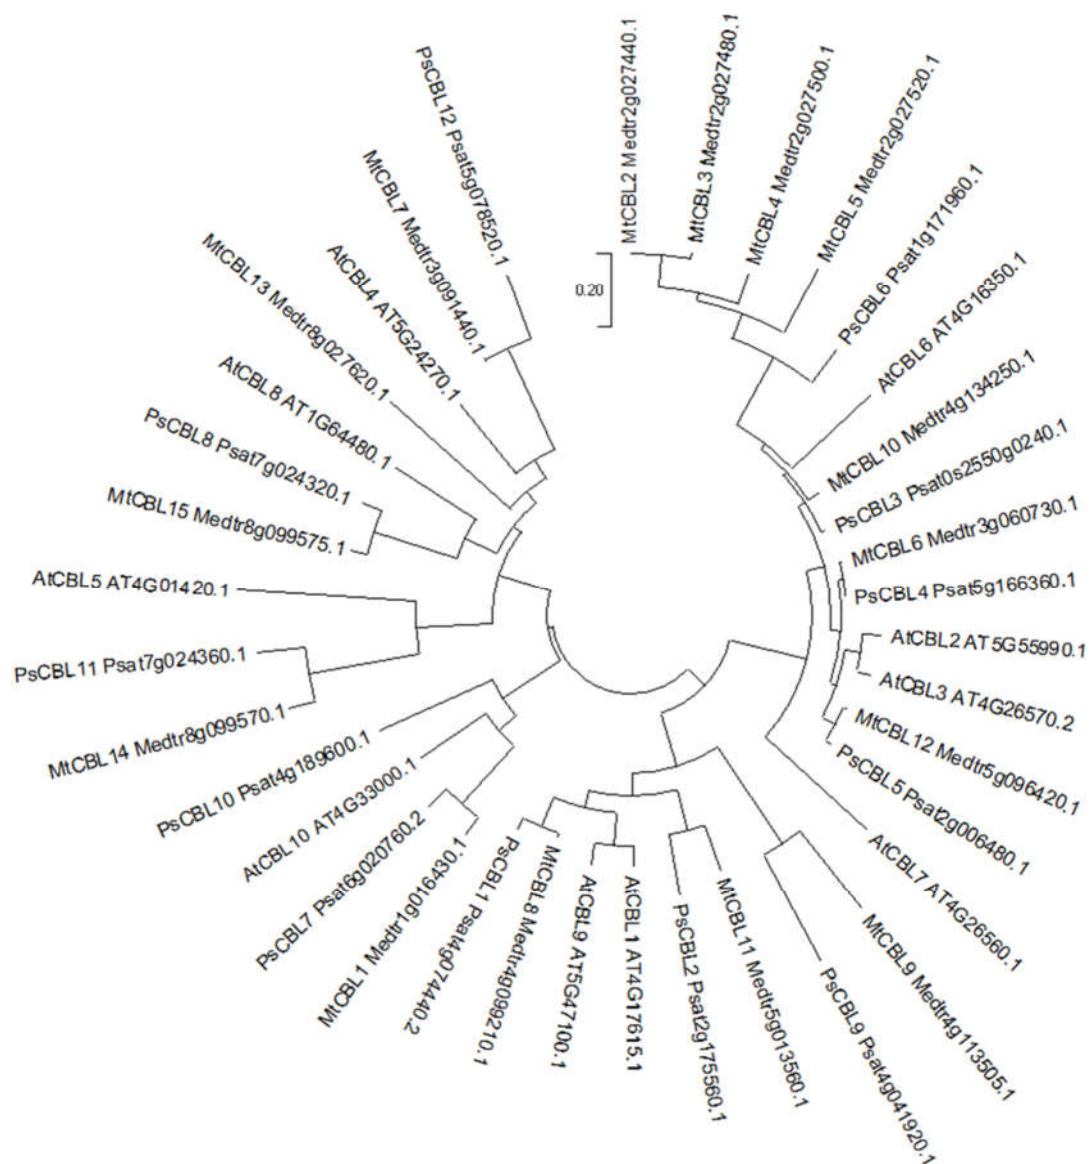

**Supplemental Figure S15.** A phylogenetic tree of CALCINEURIN B-LIKE (CBL) proteins from *Arabidopsis thaliana*, *Medicago truncatula* and *Pisum sativum*.

C.

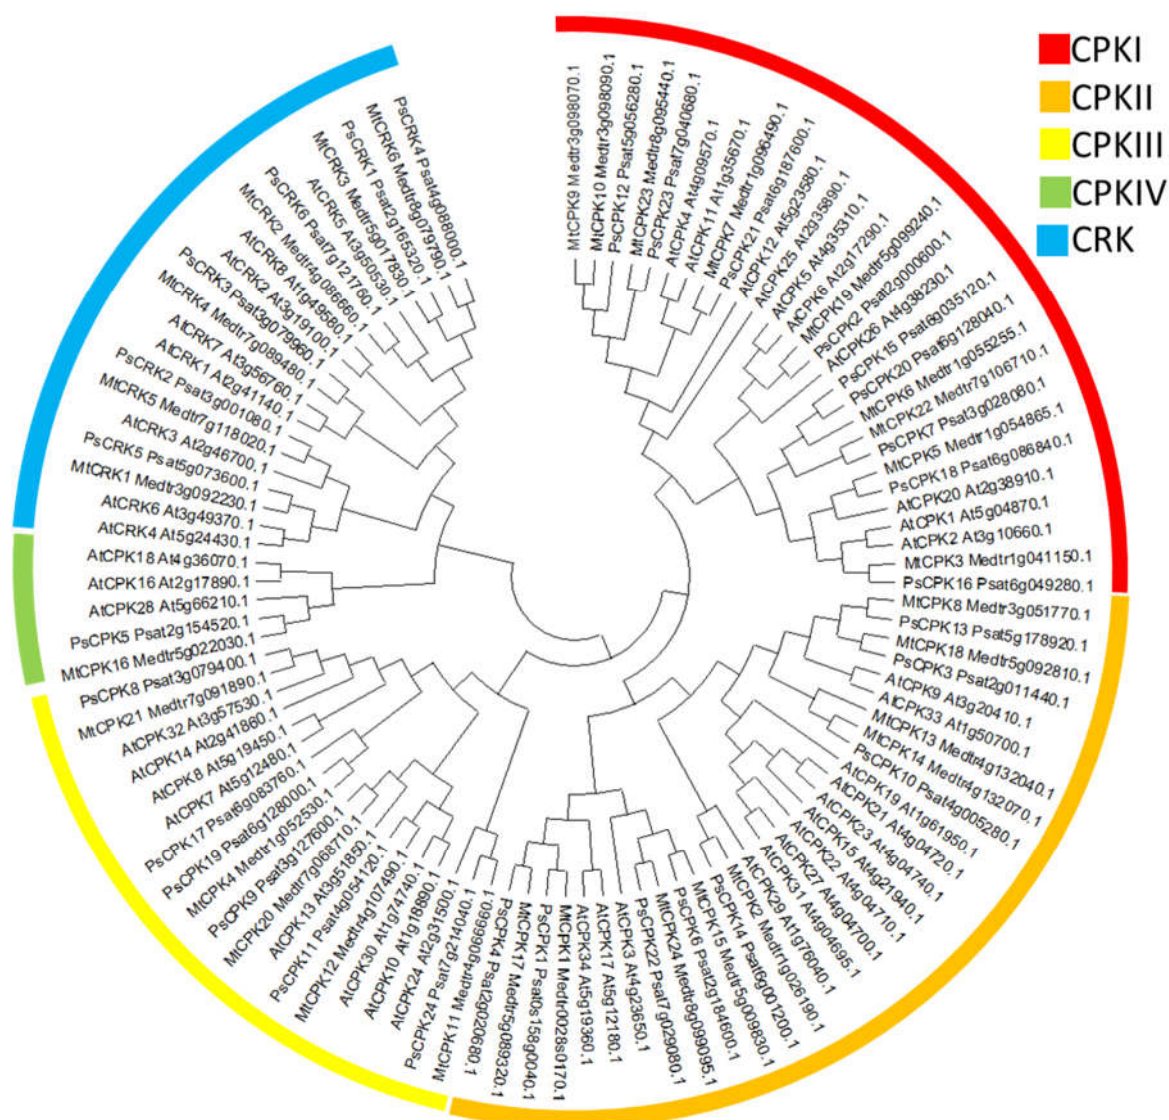

**Supplemental Figure S16.** A phylogenetic tree of CALCIUM-DEPENDENT PROTEIN KINASE (CPK) and CALCIUM-DEPENDENT PROTEIN RELATED KINASE (CRK) proteins from *Arabidopsis thaliana*, *Medicago truncatula* and *Pisum sativum*.

Four subgroups of CPK and CRK group are indicated by red (CPKI), orange (CPKII), yellow (CPKIII), green (CPKIV) and blue (CRK).

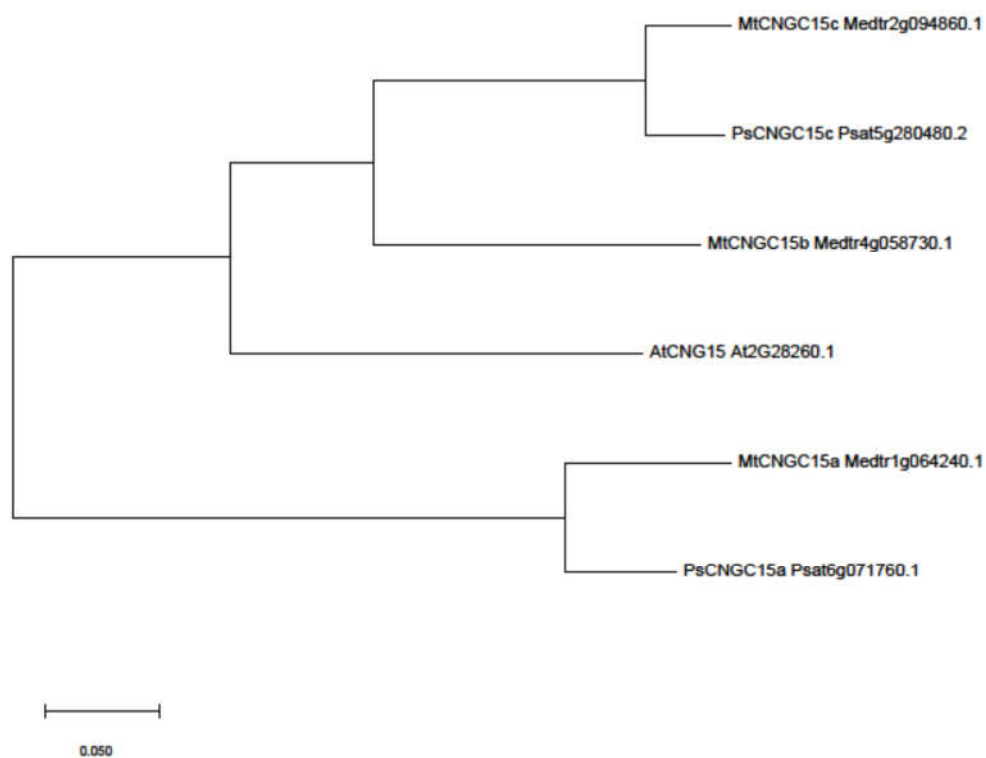

**Supplemental Figure S17.** A phylogenetic tree of CYCLIC NUCLEOTIDE-GATED CHANNEL 15 (CNGC15) proteins from *Arabidopsis thaliana*, *Medicago truncatula* and *Pisum sativum*.

A

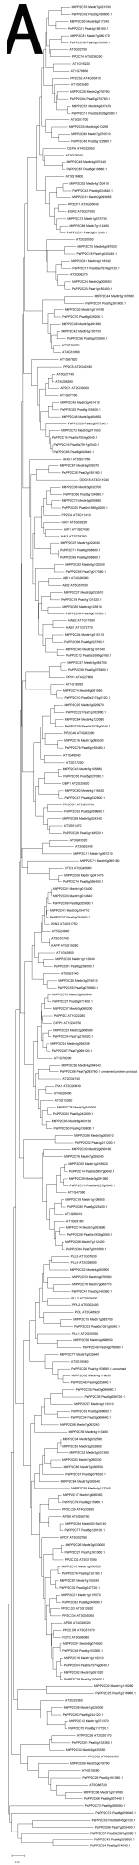



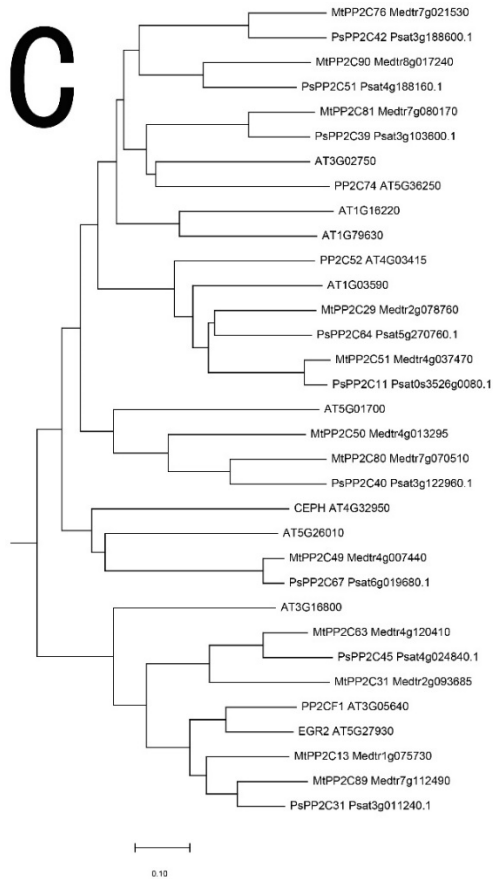

A. The whole phylogenetic tree.  
B. Branch of ABA INSENSITIVE 1 (ABI1).  
C. Branch of CEPD-INDUCED PHOSPHATASE (CEPH).



**Supplemental Table S1.** Data and condition of nitrate content in Figure 2

| Pea Non-inoculation |   | $\mu\text{mol/g FW}$ | Nitrate condition | Reference |
|---------------------|---|----------------------|-------------------|-----------|
|                     | 1 | 13.85                | 2mM Nitrate       | 27        |
|                     | 2 | 12.2                 | 2mM Nitrate       | 26        |
| Pea Inoculated      |   |                      |                   |           |
|                     | 1 | 9.19                 | 2mM Nitrate       | 27        |
|                     | 2 | 13.75                | 2mM Nitrate       | 26        |
|                     | 3 | 5                    | 4mM Nitrate       | 25        |
| Arabidopsis         |   |                      |                   |           |
|                     | 1 | 129.15               | 0.2mM Nitrate     | 16        |
|                     | 2 | 147.22               | 6mM Nitrate       | 28        |
|                     | 3 | 94.25                | 0.2mM Nitrate     | 29        |
| Wheat               |   |                      |                   |           |
|                     | 1 | 77                   | 5mM Nitrate       | 32        |
|                     | 2 | 59.8                 | Nitrate applied   | 30        |
|                     | 3 | 29.64                | Nitrate applied   | 31        |

FW: Fresh weight
